# Supplementary material for: A novel antibody combination to identify KIR2DS2high natural killer cells in KIR2DL3/L2/S2 heterozygous donors
Source: PubMed Central journal article supplement (PMC6492158; doi:10.1111/tan.13413), 2019-01-15
Supplement: TAN-93-32-s001.pdf [file TAN-93-32-s001.pdf]

**Supplementary Table 1.** Allelic typing of donors used in this study. N/A indicates data not available.

| <b>Donor</b> | <b>KIR2DL3</b>     | <b>KIR2DL2</b>     | <b>KIR2DS2</b>     |
|--------------|--------------------|--------------------|--------------------|
| 1            | <i>*002</i>        | <i>*003</i>        | <i>*001</i>        |
| 2            | <i>*002</i>        | <i>*003</i>        | <i>*001</i>        |
| 3            | <i>*001</i>        | <i>*003</i>        | <i>*001</i>        |
| 4            | Negative           | <i>*001 + *003</i> | <i>*001 + *001</i> |
| 5            | <i>*002</i>        | <i>*001</i>        | <i>*001</i>        |
| 6            | <i>*001</i>        | <i>*001</i>        | <i>*006</i>        |
| 7            | <i>*001</i>        | <i>*003</i>        | <i>*001</i>        |
| 8            | <i>*001 + *001</i> | Negative           | Negative           |
| 9            | N/A                | Negative           | Negative           |
| 10           | <i>*001 + *001</i> | Negative           | Negative           |
| 11           | <i>*001 + *002</i> | Negative           | Negative           |
| 12           | N/A                | Negative           | Negative           |
| 13           | <i>*001 + *001</i> | Negative           | Negative           |
| 14           | <i>*001 + *001</i> | Negative           | Negative           |
| 15           | Negative           | <i>*001 + *003</i> | <i>*001 + *001</i> |
| 16           | Negative           | <i>*001 + *003</i> | <i>*001 + *001</i> |
| 17           | Negative           | N/A                | N/A                |
| 18           | <i>*001</i>        | <i>*003</i>        | <i>*001</i>        |
| 19           | <i>*002</i>        | <i>*001</i>        | <i>*001</i>        |
| 20           | <i>*001</i>        | <i>*001</i>        | <i>*001</i>        |
| 21           | <i>*001</i>        | <i>*003</i>        | <i>*001</i>        |
